# Supplementary material for: Effects of Carboxymethyl Modification on the Acidic Polysaccharides from Calocybe indica: Physicochemical Properties, Antioxidant, Antitumor and Anticoagulant Activities
Source: MDPI journal article supplement (doi:10.3390/antiox12010105), 2022-12-31
Supplement: s1 [file s1]

A

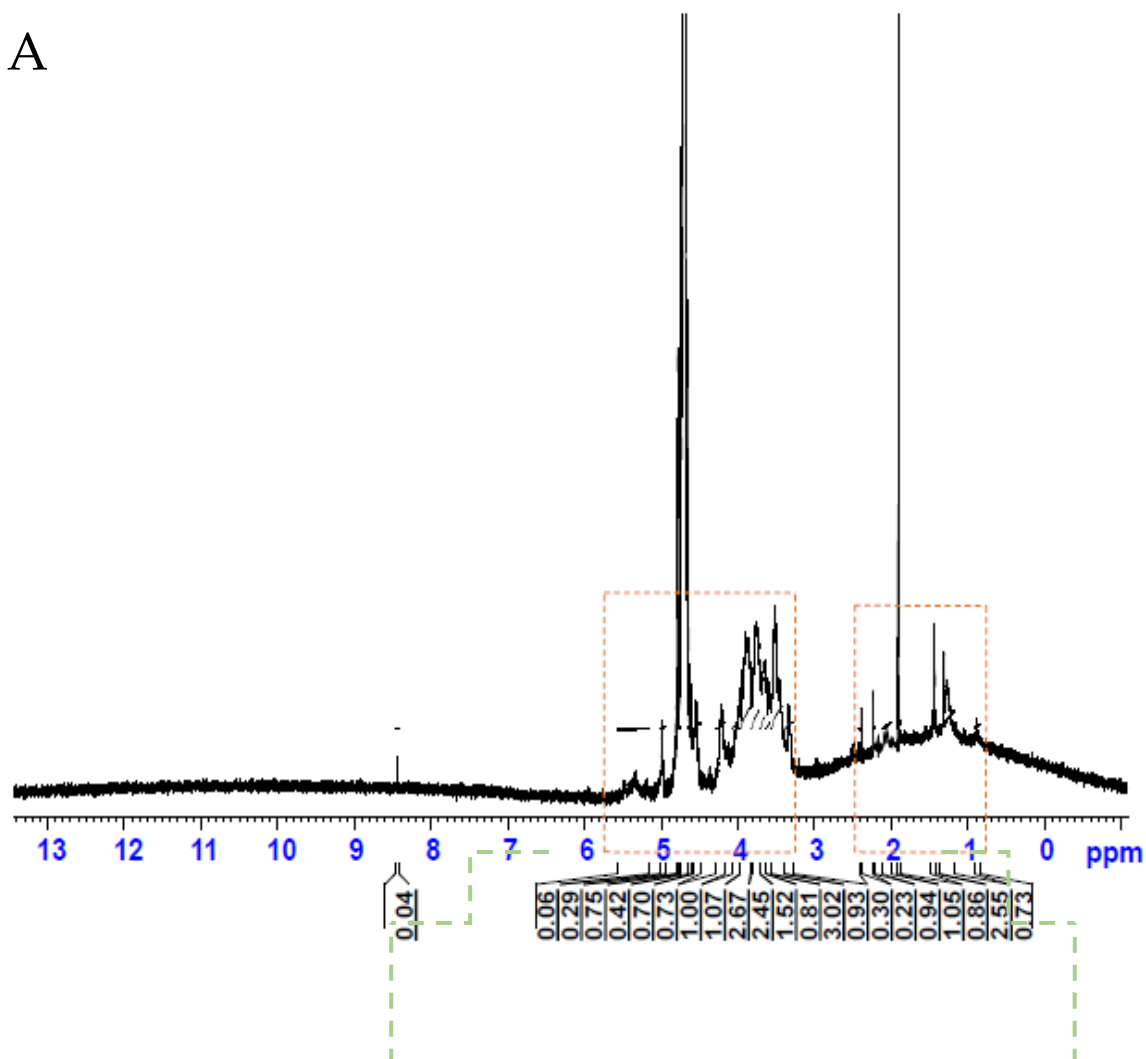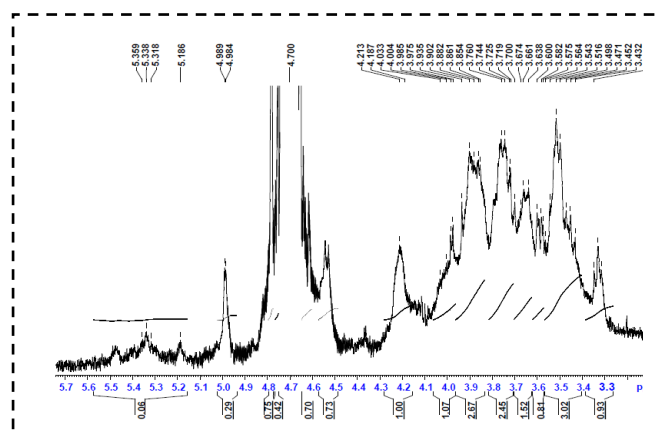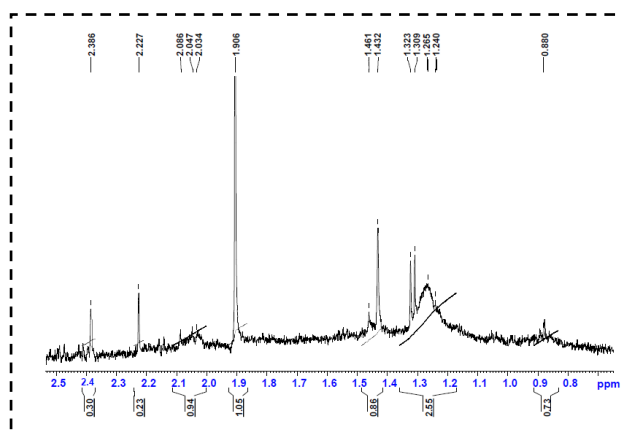

B

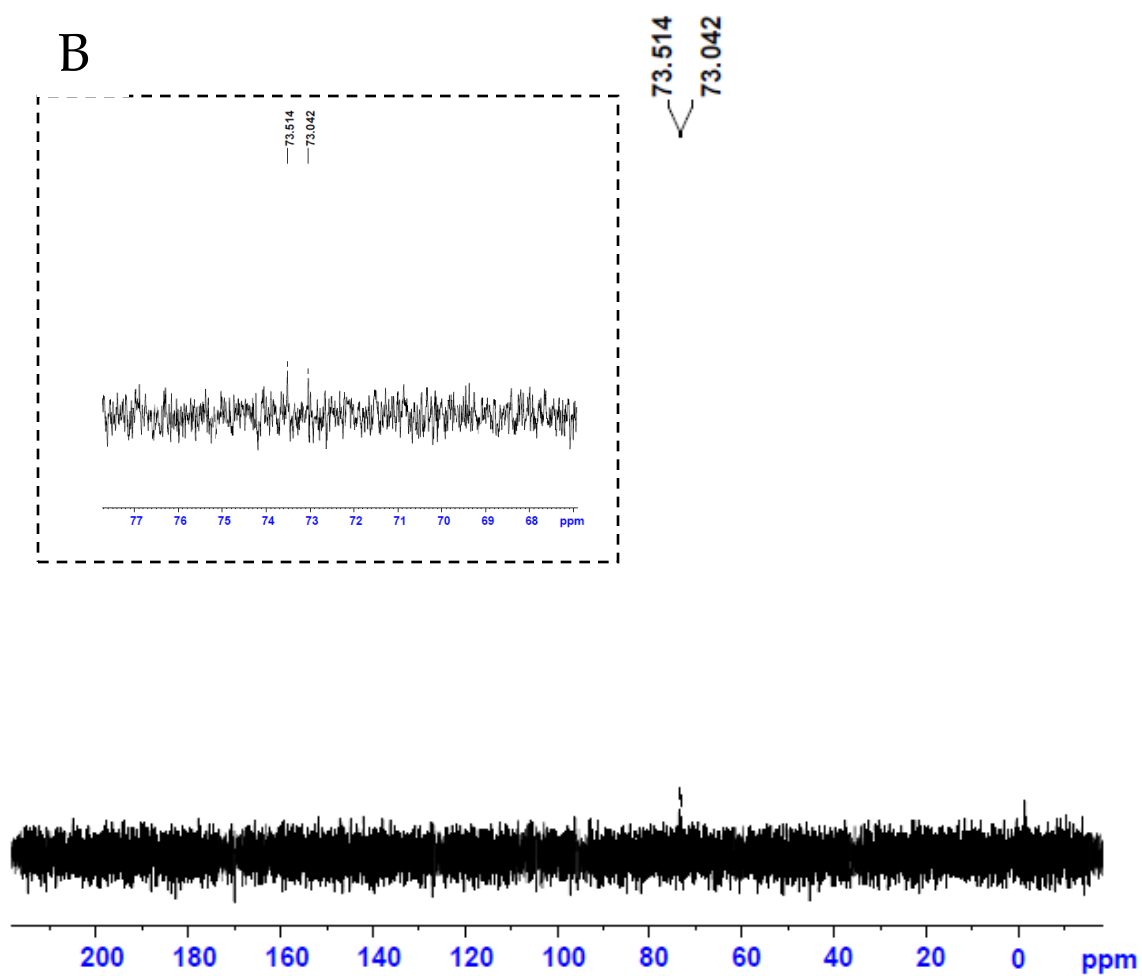

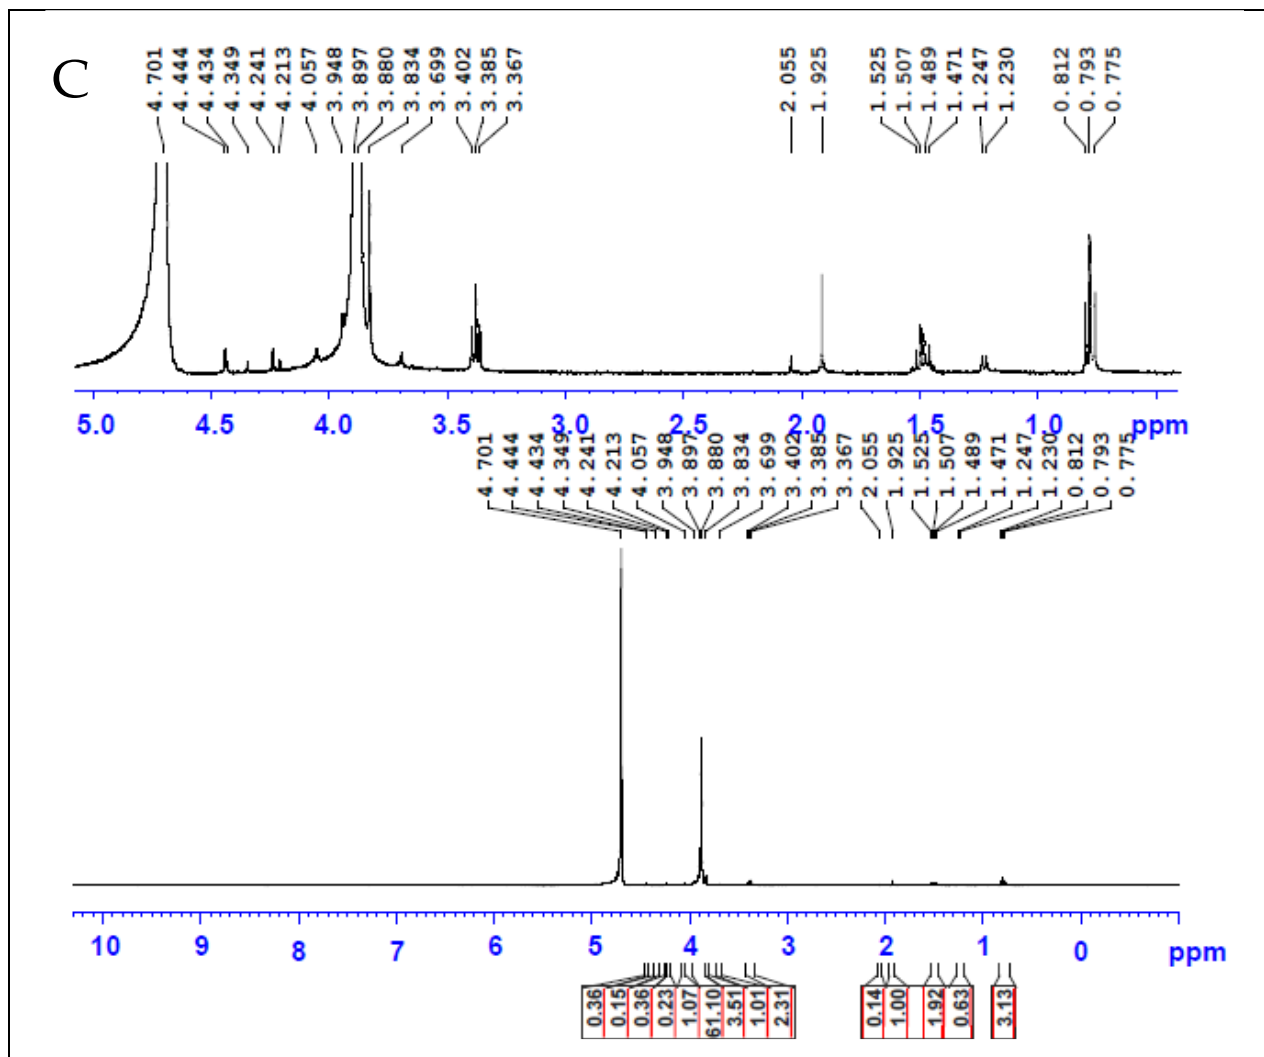

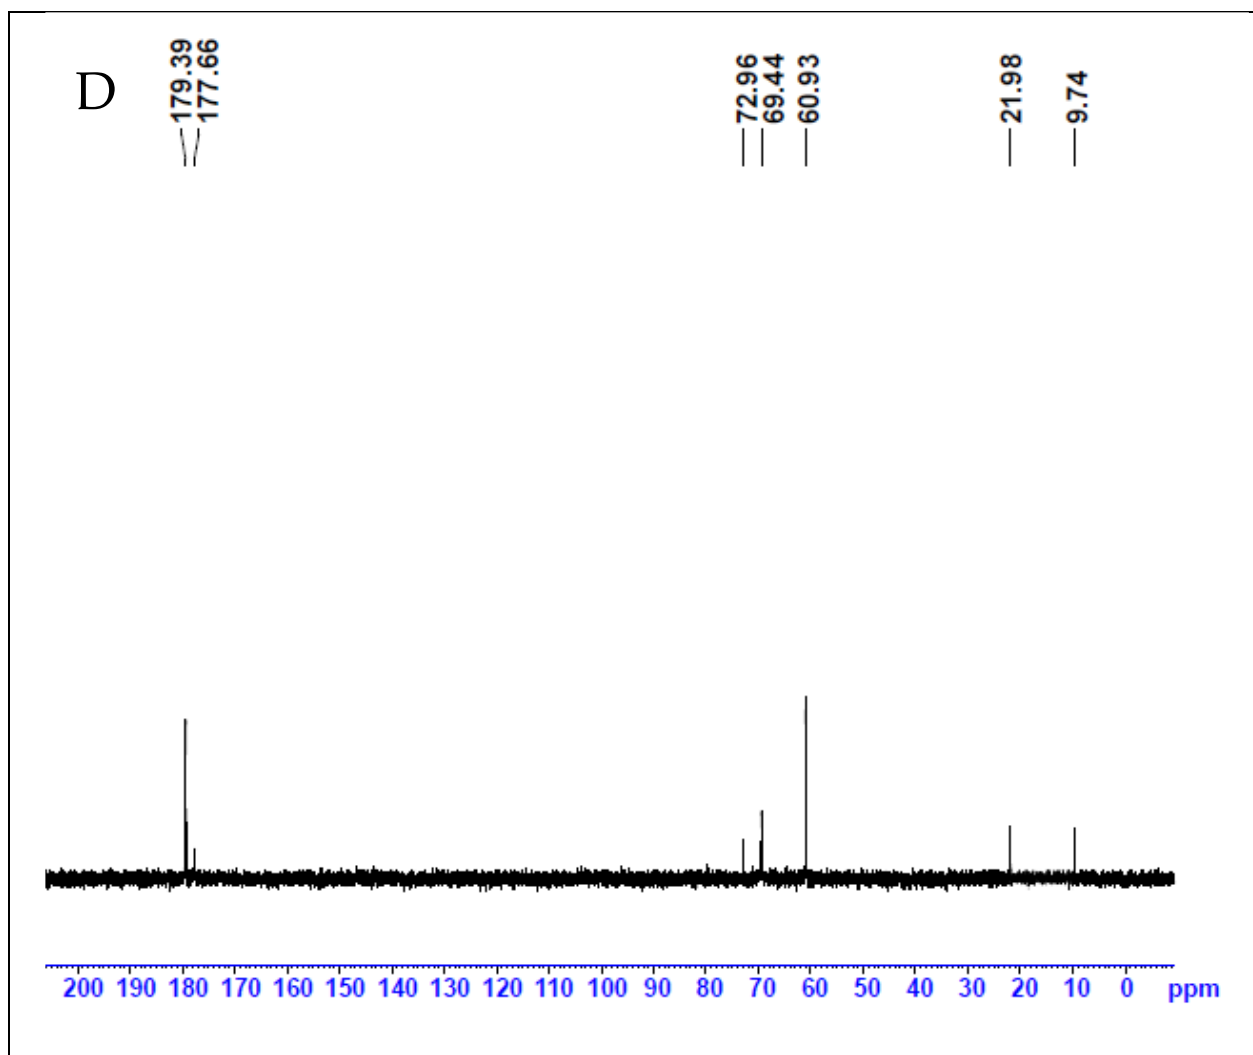

**Figure S1.** NMR spectrum of CIP3a and CMCIP3a, (A)  $^1\text{H}$  NMR of CIP3a, (B)  $^{13}\text{C}$  NMR of CIP3a, (C)  $^1\text{H}$  NMR of CMCIP3a, and (D)  $^{13}\text{C}$  NMR of CMCIP3a.

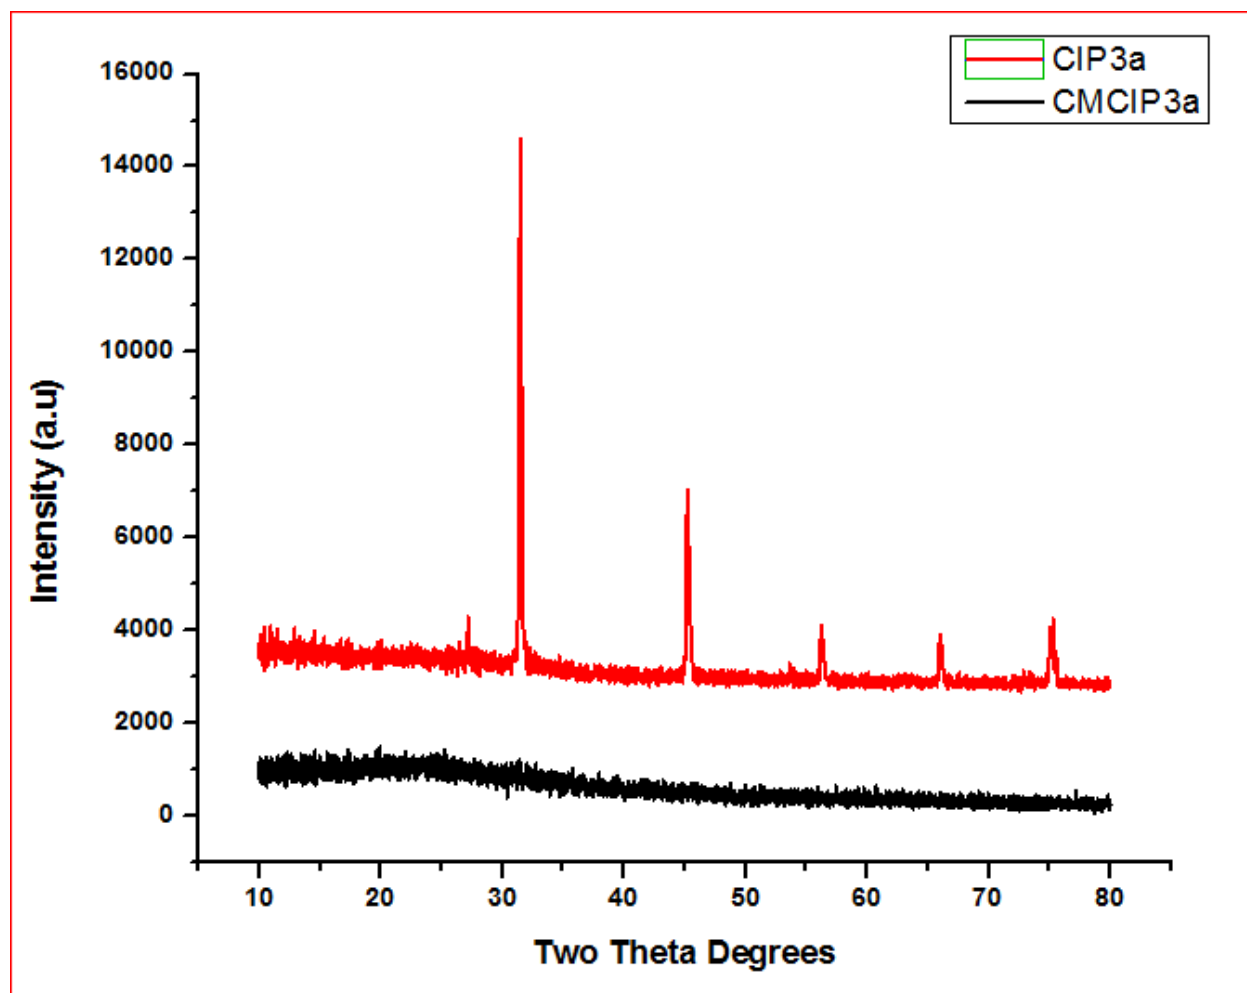

**Figure S2.** XRD analysis of CIP3a and CMCIP3a.
